# Supplementary material for: Easy preparation of an MRI contrast agent with high longitudinal relaxivity based on gadolinium ions-loaded graphene oxide
Source: Royal Society of Chemistry journal article supplement (doi:10.1039/c4ra09073j), 2014-01-01
Supplement: c4ra09073j1.pdf [file c4ra09073j1.pdf]

Electronic Supporting Information

**Facile preparation of a MRI contrast agent with high longitudinal relaxivity  
based on gadolinium ions-loaded graphene oxide**

Xianyan Ren,<sup>a,b</sup> Xinli Jing,<sup>a</sup> Lihua Liu,<sup>c</sup> Liping Guo,<sup>c</sup> Ming Zhang,<sup>c</sup> and Yu Li <sup>a\*</sup>

<sup>a</sup> *Department of Applied Chemistry, School of Science, Xi'an Jiaotong University ,  
Xi'an, 710049, China.*

*Fax: +86 29 83237910; Tel.: +86 29 68640809; E-mail: rgfp-jing@mail.xjtu.edu.cn,  
yuli2012@mail.xjtu.edu.cn.*

<sup>b</sup> *State Key Laboratory Cultivation Base for Nonmetal Composite and Functional  
Material, Southwest University of Science and Technology, Mianyang, 621010, China*

<sup>c</sup> *First Affiliated Hospital of Xi'an Jiaotong University, Xi'an, 710049, China.*

**1. Raman spectra**

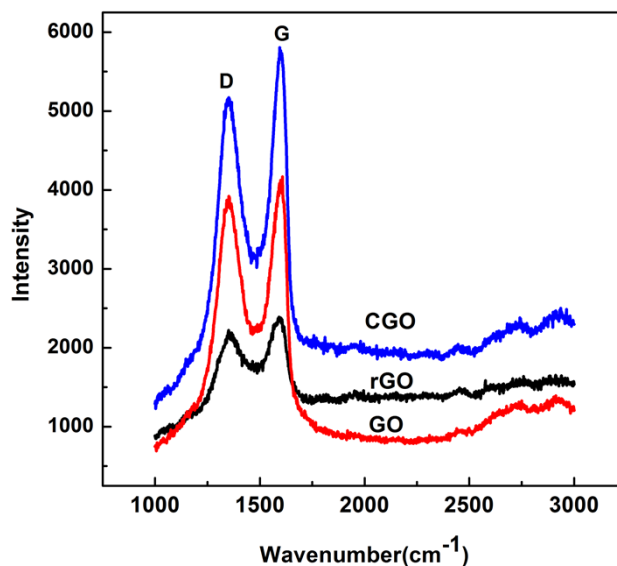

Figure S1 Raman spectra of CGO, rGO and GO

## 2. Core-level XPS analysis

Table S1 Molar ratio of C=O to C-O bond in GO, rGO and CGO, respectively.

| Sample | Bond | C-C (%) | C-O (%) | C=O (%) | C=O/C-O |
|--------|------|---------|---------|---------|---------|
| GO     |      | 26.2    | 50.5    | 23.3    | 0.46    |
| rGO    |      | 60.4    | 26.8    | 12.8    | 0.48    |
| CGO    |      | 58.5    | 21.2    | 20.3    | 0.96    |

## 3. FT-IR spectra

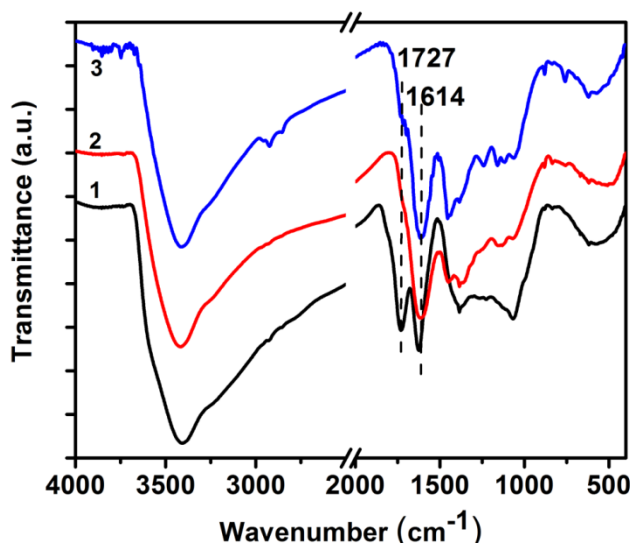

Figure S2 IR spectra of GO (1), CGO (2), and Gd<sup>3+</sup>@CGO (3)

## 4. Cytotoxicity

The cytotoxicities of the GO and CGO were assessed on HeLa cells, respectively, and were performed through the CCK-8 assay (Signalway Antibody, SAB).<sup>1</sup> HeLa cells were planted in the 96-well plates ( $5 \times 10^3$  cell per well) and then cultured with RPMI1640 (Hyclone) in a humidified incubator with 5% CO<sub>2</sub> at 37 °C. After an incubation period of 24 h, different concentration (10, 20, 40, 80, 100, 200  $\mu\text{g mL}^{-1}$ ) of the GO and CGO were added to each well of the 96-well plates, respectively. And cells cultured in the medium without GO nor CGO were taken as the control. After 24h incubation, CCK-8 solution was added to each well and incubated for another 4h at 37 °C, the optical density (OD) of each well was measured with a Microplate Reader at 450 nm. The cell viability (%) =  $(OD_{\text{sample}} - OD_{\text{blank}}) / (OD_{\text{control}} - OD_{\text{blank}}) \times 100\%$ ,<sup>2</sup> where the subscript *blank* is the wells without Hela cells.

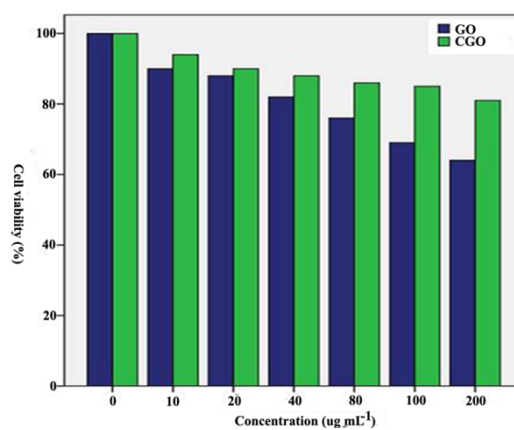

Figure S3 Viability of HeLa cells incubated in various concentrations of GO and CGO for 24 h.

## References

1. H. Yue, W. Wei, Z. Yue, B. Wang, N. Luo, Y. Gao, D. Ma, G. Ma and Z. Su, *Biomaterials*, 2012.
2. Y. Chang, S.-T. Yang, J.-H. Liu, E. Dong, Y. Wang, A. Cao, Y. Liu and H. Wang, *Toxicology letters*, 2011, 200, 201-210.
